# Supplementary material for: Identification of GATA Transcription Factors in Brachypodium distachyon and Functional Characterization of BdGATA13 in Drought Tolerance and Response to Gibberellins
Source: PubMed Central journal article supplement (PMC8567175; doi:10.3389/fpls.2021.763665), 2021-10-21

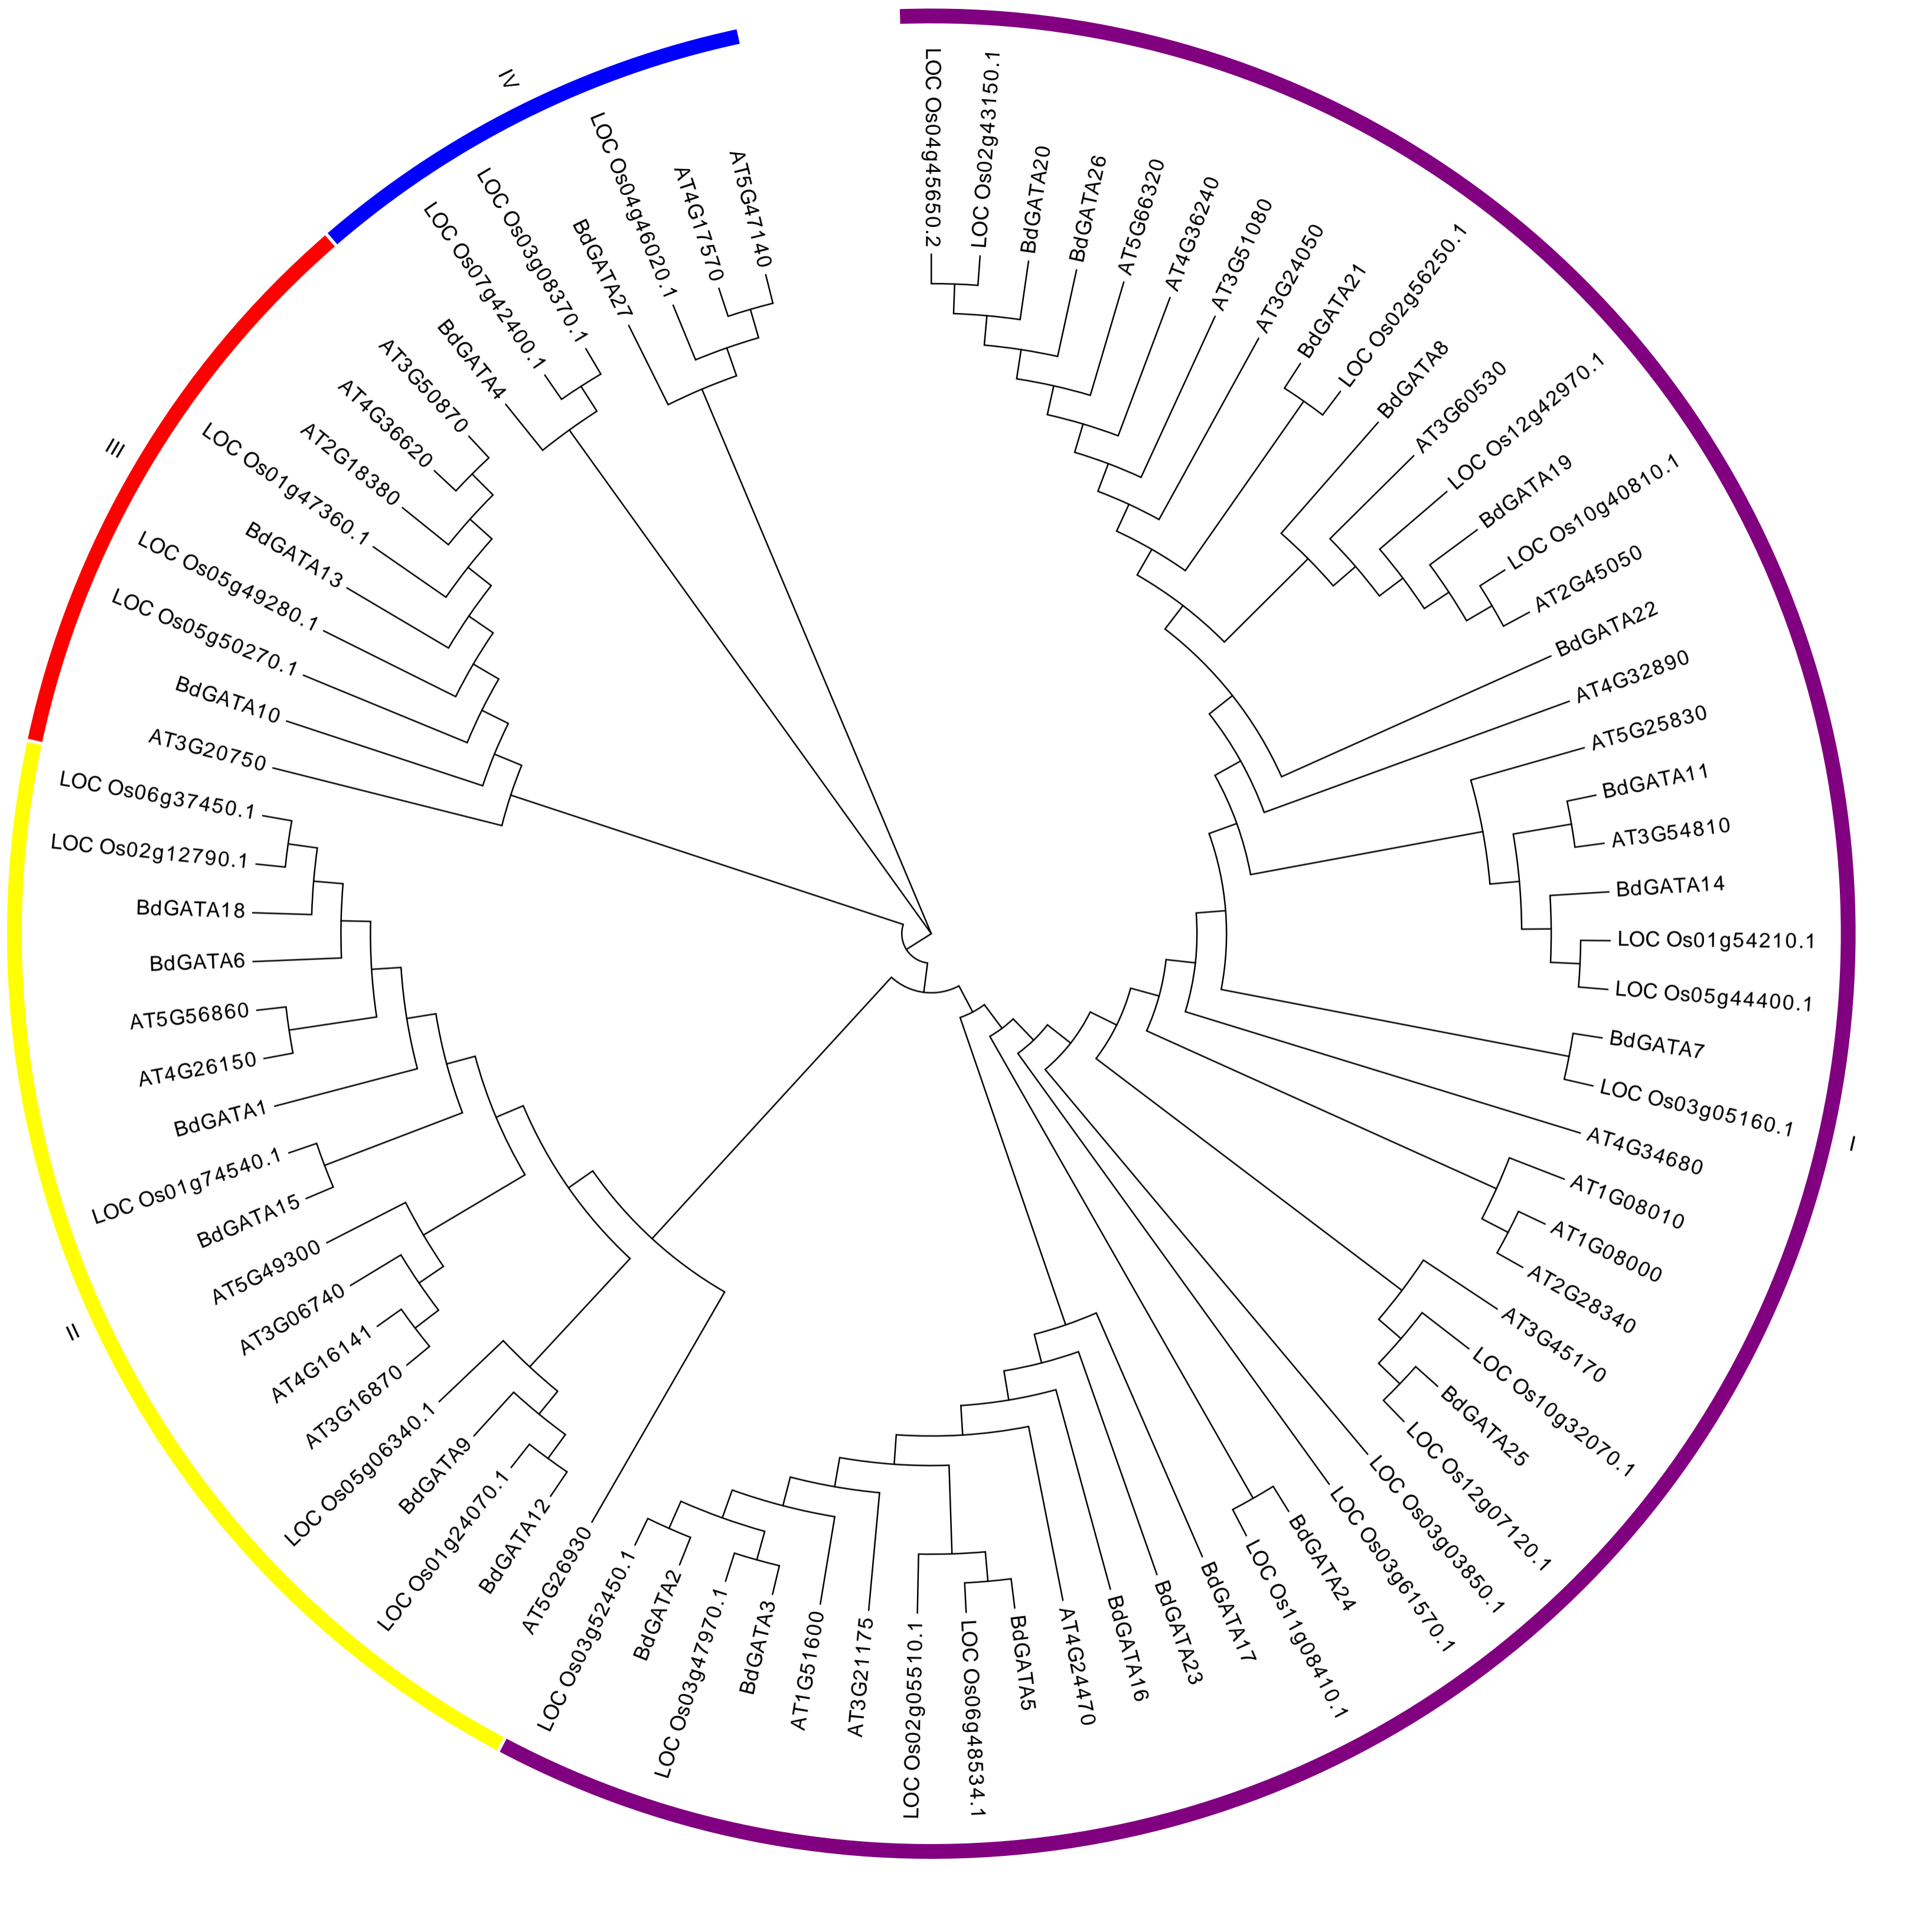

Supplement: Image_1.pdf [file Image_1.pdf]
